# Supplementary material
Source: bioRxiv or medRxiv preprint supplement (https://www.biorxiv.org/highwire/filestream/53013/field_highwire_adjunct_files/2/176032-3.pdf)
Supplement: Supplementary file [file 176032-3.pdf]

JUN  
SERPINE1  
PLAUR  
BHLHE40  
KLF6  
DUSP1  
BTG1  
EFNA1  
FOSL2  
TGFB1  
SULT2B1  
SCARB1  
CA12  
WISP2  
SLC2A1  
CITED2  
HSPA5  
GLRX  
GALK1  
HMOX1  
BNIP3L  
ADM  
MT2A  
KLF7  
PTRF  
AMPD3  
CD44  
SAT1  
PMEPA1  
B4GALT1  
SOD2  
CFLAR  
SPHK1  
NAMPT  
ABCA1  
DUSP5  
PHLDA1  
SIK1  
DUSP4  
PLOD2  
QSOX1  
TFPI2  
PVR  
TGFB1  
FBLN1  
BMP1  
APLP1  
FLNA

BASP1  
COL7A1  
TPM1  
PLOD3  
NCOR2  
TOB1  
PRSS23  
FLNB  
ABCA3  
P2RY2  
FASN  
TSKU  
RHOD  
TSTA3  
NANP  
PYGB  
PYGL  
HOMER1  
SMAD7  
TGFB2  
TIMP2  
DAP3  
PEA15  
HOMER2  
ATP2A2  
HRH1  
IRAK2  
AXL  
BMPR2  
BCAR3  
SKIL  
PTPN21  
ANXA4  
YTHDC1  
SYNE1  
FZD2  
NFIB  
ACOX1  
DHRS1  
GART  
MTHFD1  
SAR1B  
ABCC3  
DGKA  
HIST1H1C  
RAP2B  
ZFP36L1  
CSRP1

RABIF  
GNG12  
ACSL3  
APPBP2  
STX4  
NCOA3  
PLEC  
MVP  
STAT3  
RNF213  
SPPL2A  
RIT1  
CRAT  
ITGB1BP1  
SUCLG1  
G3BP2  
CCNB2  
PRC1  
HNRNPD  
ILF3  
RPS6KA5  
NARF  
SLC25A37  
YPEL5  
PPOX  
PSMD9  
KAT2B  
CLASP1  
ARF6  
SOS1  
ALMS1  
GOSR2  
AP1G1  
RAB14  
SCAMP1  
ITGA3  
RSU1  
HSD17B6  
HSDL2  
HSPA2  
GLS  
ATF1  
RPTOR  
IL11  
SOCS5  
POLD3  
DNMT1  
WIPI1

CPEB3  
PTPRJ  
SNAP25  
SLC25A6  
ATP5E  
CSTF3  
RSL1D1  
L1CAM  
COL4A3BP  
HIPK3  
CDK5  
ANAPC10  
HMGN4  
SEMA4B  
KAT5  
RABAC1  
TACC2  
CDC42EP3  
SEC24A  
PDE10A  
PPP1R13L  
SNRNP27  
HNRNPUL1  
ATE1  
WDR45  
DUSP10  
PNKP  
LYST  
AHNAK2  
STK38  
MFSD3  
LACTB  
ELFN2  
PWWP2A  
FBXO32  
FBXO17  
SOCS4  
C15orf40  
TARSL2  
NACC2  
ATF2  
ASB8  
KRT80  
CSNK1G3  
SAMD11  
CCDC80  
ANKRD46  
AP2A1

DYX1C1  
DBN1  
BBS12  
MEGF8  
EPAS1  
EPB41L1  
SLC36A1  
TYSND1  
DAGLB  
DLGAP4  
SHANK2  
KDM1A  
TTLL5  
ATG2A  
MPRIP  
RPGRIP1L  
ZDHHC17  
SIRT3  
SF3B1  
RUSC1  
PLA2G15  
ANKRD18A  
EHBP1L1  
NGEF  
NIPSNAP3A  
PNISR  
C2CD3  
SPATS2L  
LSM14A  
HERC4  
DCAF4  
SEZ6L2  
PPP1R14B  
TBL2  
HBP1  
RAB30  
GOLGA1  
IAH1  
ZNF789  
GPS2  
LAMTOR2  
POMT2  
HAS3  
CDR2L  
HPCAL1  
IL11RA  
NHLRC2  
MALAT1

KPNA1  
LAMA5  
EML6  
LNPEP  
LRP3  
MAP3K3  
CNOT3  
CHST11  
PAPPA  
ASAP1  
STMN3  
ZNF580  
CYB5R4  
PAIP2  
CTDSPL2  
ZFAND6  
RC3H2  
BNC2  
CNNM2  
DPP8  
SSH3  
UCKL1  
THG1L  
PDPR  
APPL2  
SBNO1  
OGFOD1  
VPS53  
TCP11L1  
ZNF331  
CDC37L1  
CAND1  
ASH1L  
NPDC1  
ZC3HAV1  
C15orf39  
C1GALT1  
DTWD1  
BAD  
TTC7A  
ERGIC1  
MAVS  
CASKIN2  
ZNF398  
TAOK1  
ARRDC3  
FAM135A  
ZBTB4

ZBED5  
ZNF250  
RBM25  
KDM5A  
RBM3  
IRF2BPL  
IKZF5  
DCLRE1C  
FBXL17  
SLC9A1  
SMARCE1  
BNIP2  
SOX4  
SOX12  
SP3  
TBX3  
TEAD1  
TFAP2A  
TULP3  
UBE2H  
ZNF33B  
MAP3K12  
PTP4A1  
CACNB3  
FA2H  
LRFN3  
TTC13  
CDC73  
SPAG16  
CARS2  
DHX40  
MICALL2  
DOCK5  
PHC3  
BICC1  
CHD9  
EPC1  
ARHGAP39  
SETD7  
TRIM8  
LBH  
SFXN3  
CAMLG  
KDM5C  
HIST1H2AC  
HIST1H4H  
RASSF4  
ULK1

ANTXR1  
RHBDD1  
TMEM107  
TMEM101  
ZNF512  
ZNF469  
TXNDC17  
SFT2D3  
TRIM52  
ZNF514  
TMEM87B  
TNS4  
PPP1R16A  
DGKD  
ZCCHC3  
BLZF1  
PDXK  
PLA2G4C  
FAM127A  
SYS1  
TMEM41A  
GPRC5A  
COX19  
ZNF251  
ATG12  
SCAF11  
ARRDC1  
COQ10A  
MYOCD  
EIF4E2  
PIGL  
PREPL  
PITPNM1  
MICAL2  
GCC2  
SPCS2  
KIAA0141  
PLEKHM1  
UBAP2L  
MRC2  
SGSM2
